# Supplementary material for: Muscular fatigue in response to different modalities of CrossFit sessions
Source: PubMed Central journal article supplement (PMC5533437; doi:10.1371/journal.pone.0181855), 2017-07-28
Supplement: pone.0181855.s001.pdf [file pone.0181855.s001.pdf]

**Estadísticos descriptivos**

|                             | N  | Mínimo | Máximo | Media    | Desv. típ. |
|-----------------------------|----|--------|--------|----------|------------|
| Edad                        | 34 | 19,00  | 33,00  | 22,0294  | 3,14773    |
| Peso                        | 34 | 62,90  | 90,60  | 76,8997  | 7,04920    |
| Talla                       | 34 | 1,61   | 1,92   | 1,7865   | ,06427     |
| G_Sindys                    | 34 | 16,00  | 26,00  | 19,5882  | 2,59507    |
| M_nº_Dcomba_S1              | 34 | 2,00   | 30,00  | 13,8529  | 7,73474    |
| M_nº_Dcomba_S2              | 34 | 1,00   | 35,00  | 12,7647  | 7,21135    |
| M_nº_Dcomba_S3              | 34 | 4,00   | 28,00  | 11,7059  | 6,45980    |
| M_nº_Dcomba_S4              | 34 | 3,00   | 21,00  | 9,6176   | 4,94218    |
| M_nº_Dcomba_S5              | 34 | 4,00   | 25,00  | 10,6471  | 5,70424    |
| M_nº_Dcomba_S6              | 34 | 3,00   | 21,00  | 9,8824   | 5,00766    |
| M_nº_Dcomba_S7              | 34 | 3,00   | 23,00  | 10,2059  | 5,21524    |
| M_nº_Dcomba_S8              | 34 | 2,00   | 21,00  | 9,3529   | 5,06253    |
| W_nº_Cargadas_Completa<br>s | 34 | 76,00  | 186,00 | 108,8529 | 24,35984   |
| N válido (según lista)      | 34 |        |        |          |            |
