# Supplementary material for: Muscular fatigue in response to different modalities of CrossFit sessions
Source: PubMed Central journal article supplement (PMC5533437; doi:10.1371/journal.pone.0181855), 2017-07-28
Supplement: pone.0181855.s002.pdf [file pone.0181855.s002.pdf]

# LACTATE

## Factores intra-sujetos

Medida: MEASURE\_1

| TIEMPO | Variable dependiente |
|--------|----------------------|
| _ 1    | Lactato_reposo       |
| _ 2    | Lactato_final        |

## Factores inter-sujetos

|          | Etiqueta del valor | N  |
|----------|--------------------|----|
| Grupos 1 | Gimnástica         | 34 |
| 2        | Metabólico         | 34 |
| 3        | Weight             | 34 |

## Estadísticos descriptivos

| Grupos         |            | Media   | Desviación típica | N   |
|----------------|------------|---------|-------------------|-----|
| Lactato_reposo | Gimnástica | 1,5647  | ,61540            | 34  |
|                | Metabólico | 1,3059  | ,37086            | 34  |
|                | Weight     | 1,2265  | ,31843            | 34  |
|                | Total      | 1,3657  | ,47209            | 102 |
| Lactato_final  | Gimnástica | 11,7971 | 2,33049           | 34  |
|                | Metabólico | 10,1588 | 3,04383           | 34  |
|                | Weight     | 11,2441 | 2,62819           | 34  |
|                | Total      | 11,0667 | 2,74339           | 102 |

Contrastes multivariados<sup>c</sup>

| Efecto          |                    | Valor  | F                     | Gl de la hipótesis | Gl del error | Sig. | Eta al cuadrado parcial | Parámetro de no centralidad Parámetro | Potencia observada <sup>b</sup> |
|-----------------|--------------------|--------|-----------------------|--------------------|--------------|------|-------------------------|---------------------------------------|---------------------------------|
| TIEMPO          | Traza de Pillai    | ,931   | 1342,879 <sup>a</sup> | 1,000              | 99,000       | ,000 | ,931                    | 1342,879                              | 1,000                           |
|                 | Lambda de Wilks    | ,069   | 1342,879 <sup>a</sup> | 1,000              | 99,000       | ,000 | ,931                    | 1342,879                              | 1,000                           |
|                 | Traza de Hotelling | 13,564 | 1342,879 <sup>a</sup> | 1,000              | 99,000       | ,000 | ,931                    | 1342,879                              | 1,000                           |
|                 | Raíz mayor de Roy  | 13,564 | 1342,879 <sup>a</sup> | 1,000              | 99,000       | ,000 | ,931                    | 1342,879                              | 1,000                           |
| TIEMPO * Grupos | Traza de Pillai    | ,050   | 2,620 <sup>a</sup>    | 2,000              | 99,000       | ,078 | ,050                    | 5,241                                 | ,511                            |
|                 | Lambda de Wilks    | ,950   | 2,620 <sup>a</sup>    | 2,000              | 99,000       | ,078 | ,050                    | 5,241                                 | ,511                            |
|                 | Traza de Hotelling | ,053   | 2,620 <sup>a</sup>    | 2,000              | 99,000       | ,078 | ,050                    | 5,241                                 | ,511                            |
|                 | Raíz mayor de Roy  | ,053   | 2,620 <sup>a</sup>    | 2,000              | 99,000       | ,078 | ,050                    | 5,241                                 | ,511                            |

a. Estadístico exacto

b. Calculado con alfa = ,05

c. Diseño: Intersección + Grupos

Diseño intra-sujetos: TIEMPO

**Prueba de esfericidad de Mauchly<sup>b</sup>**

Medida:MEASURE\_1

| Efecto intra-sujetos | W de Mauchly | Chi-cuadrado<br>aprox. | gl | Sig. | Epsilon <sup>a</sup>   |             |                 |
|----------------------|--------------|------------------------|----|------|------------------------|-------------|-----------------|
|                      |              |                        |    |      | Greenhouse-<br>Geisser | Huynh-Feldt | Límite-inferior |
| _ TIEMPO             | 1,000        | ,000                   | 0  | .    | 1,000                  | 1,000       | 1,000           |

Contrasta la hipótesis nula de que la matriz de covarianza error de las variables dependientes transformadas es proporcional a una matriz identidad.

a. Puede usarse para corregir los grados de libertad en las pruebas de significación promediadas. Las pruebas corregidas se muestran en la tabla Pruebas de los efectos inter-sujetos.

b. Diseño: Intersección + Grupos

Diseño intra-sujetos: TIEMPO

**Pruebas de efectos intra-sujetos.**

Medida:MEASURE\_1

| Origen          |                     | Suma de<br>cuadrados tipo<br>III | gl     | Media<br>cuadrática | F        | Sig. | Eta al cuadrado<br>parcial | Parámetro de<br>no centralidad<br>Parámetro | Potencia<br>observada <sup>a</sup> |
|-----------------|---------------------|----------------------------------|--------|---------------------|----------|------|----------------------------|---------------------------------------------|------------------------------------|
| TIEMPO          | Esfericidad asumida | 4799,560                         | 1      | 4799,560            | 1342,879 | ,000 | ,931                       | 1342,879                                    | 1,000                              |
|                 | Greenhouse-Geisser  | 4799,560                         | 1,000  | 4799,560            | 1342,879 | ,000 | ,931                       | 1342,879                                    | 1,000                              |
|                 | Huynh-Feldt         | 4799,560                         | 1,000  | 4799,560            | 1342,879 | ,000 | ,931                       | 1342,879                                    | 1,000                              |
|                 | Límite-inferior     | 4799,560                         | 1,000  | 4799,560            | 1342,879 | ,000 | ,931                       | 1342,879                                    | 1,000                              |
| TIEMPO * Grupos | Esfericidad asumida | 18,731                           | 2      | 9,365               | 2,620    | ,078 | ,050                       | 5,241                                       | ,511                               |
|                 | Greenhouse-Geisser  | 18,731                           | 2,000  | 9,365               | 2,620    | ,078 | ,050                       | 5,241                                       | ,511                               |
|                 | Huynh-Feldt         | 18,731                           | 2,000  | 9,365               | 2,620    | ,078 | ,050                       | 5,241                                       | ,511                               |
|                 | Límite-inferior     | 18,731                           | 2,000  | 9,365               | 2,620    | ,078 | ,050                       | 5,241                                       | ,511                               |
| Error(TIEMPO)   | Esfericidad asumida | 353,834                          | 99     | 3,574               |          |      |                            |                                             |                                    |
|                 | Greenhouse-Geisser  | 353,834                          | 99,000 | 3,574               |          |      |                            |                                             |                                    |
|                 | Huynh-Feldt         | 353,834                          | 99,000 | 3,574               |          |      |                            |                                             |                                    |
|                 | Límite-inferior     | 353,834                          | 99,000 | 3,574               |          |      |                            |                                             |                                    |

a. Calculado con alfa = ,05

**Pruebas de contrastes intra-sujetos**

Medida:MEASURE\_1

| Origen          | TIEMPO | Suma de cuadrados tipo III | gl | Media cuadrática | F        | Sig. | Eta al cuadrado parcial | Parámetro de no centralidad Parámetro | Potencia observada <sup>a</sup> |
|-----------------|--------|----------------------------|----|------------------|----------|------|-------------------------|---------------------------------------|---------------------------------|
| TIEMPO          | Lineal | 4799,560                   | 1  | 4799,560         | 1342,879 | ,000 | ,931                    | 1342,879                              | 1,000                           |
| TIEMPO * Grupos | Lineal | 18,731                     | 2  | 9,365            | 2,620    | ,078 | ,050                    | 5,241                                 | ,511                            |
| Error(TIEMPO)   | Lineal | 353,834                    | 99 | 3,574            |          |      |                         |                                       |                                 |

a. Calculado con alfa = ,05

**Pruebas de los efectos inter-sujetos**

Medida:MEASURE\_1

Variable transformada:Promedio

| Origen       | Suma de cuadrados tipo III | gl | Media cuadrática | F        | Sig. | Eta al cuadrado parcial | Parámetro de no centralidad Parámetro | Potencia observada <sup>a</sup> |
|--------------|----------------------------|----|------------------|----------|------|-------------------------|---------------------------------------|---------------------------------|
| Intersección | 7882,733                   | 1  | 7882,733         | 2056,559 | ,000 | ,954                    | 2056,559                              | 1,000                           |
| Grupos       | 30,627                     | 2  | 15,314           | 3,995    | ,021 | ,075                    | 7,990                                 | ,703                            |
| Error        | 379,464                    | 99 | 3,833            |          |      |                         |                                       |                                 |

a. Calculado con alfa = ,05

**Comparaciones por pares**

Medida:MEASURE\_1

| (I)Grupos  | (J)Grupos  | Diferencia de medias (I-J) | Error típ. | Sig. <sup>a</sup> | Intervalo de confianza al 95 % para la diferencia <sup>a</sup> |                 |
|------------|------------|----------------------------|------------|-------------------|----------------------------------------------------------------|-----------------|
|            |            |                            |            |                   | Límite inferior                                                | Límite superior |
| Gimnástica | Metabólico | ,949 <sup>*</sup>          | ,336       | ,006              | ,282                                                           | 1,615           |
|            | Weight     | ,446                       | ,336       | ,188              | -,221                                                          | 1,112           |
| Metabólico | Gimnástica | -,949 <sup>*</sup>         | ,336       | ,006              | -1,615                                                         | -,282           |
|            | Weight     | -,503                      | ,336       | ,137              | -1,169                                                         | ,163            |
| Weight     | Gimnástica | -,446                      | ,336       | ,188              | -1,112                                                         | ,221            |
|            | Metabólico | ,503                       | ,336       | ,137              | -,163                                                          | 1,169           |

Basadas en las medias marginales estimadas.

\*. La diferencia de medias es significativa al nivel ,05.

a. Ajuste para comparaciones múltiples: Diferencia menos significativa (equivalente a la ausencia de ajuste).

### 3. Grupos \* TIEMPO

Medida:MEASURE\_1

| Grupos     | TIEMPO | Media  | Error típ. | Intervalo de confianza 95% |                 |
|------------|--------|--------|------------|----------------------------|-----------------|
|            |        |        |            | Límite inferior            | Límite superior |
| Gimnástica | 1      | 1,565  | ,078       | 1,410                      | 1,719           |
|            | 2      | 11,797 | ,460       | 10,884                     | 12,710          |
| Metabólico | 1      | 1,306  | ,078       | 1,151                      | 1,460           |
|            | 2      | 10,159 | ,460       | 9,246                      | 11,072          |
| Weight     | 1      | 1,226  | ,078       | 1,072                      | 1,381           |
|            | 2      | 11,244 | ,460       | 10,331                     | 12,157          |

### Pruebas post hoc

#### Comparaciones múltiples

MEASURE\_1

Bonferroni

| (I)Grupos  | (J)Grupos  | Diferencia de medias (I-J) | Error típ. | Sig. | Intervalo de confianza 95% |                 |
|------------|------------|----------------------------|------------|------|----------------------------|-----------------|
|            |            |                            |            |      | Límite inferior            | Límite superior |
| Gimnástica | Metabólico | ,9485*                     | ,33576     | ,017 | ,1308                      | 1,7662          |
|            | Weight     | ,4456                      | ,33576     | ,563 | -,3721                     | 1,2633          |
| Metabólico | Gimnástica | -,9485*                    | ,33576     | ,017 | -1,7662                    | -,1308          |
|            | Weight     | -,5029                     | ,33576     | ,412 | -1,3206                    | ,3147           |
| Weight     | Gimnástica | -,4456                     | ,33576     | ,563 | -1,2633                    | ,3721           |
|            | Metabólico | ,5029                      | ,33576     | ,412 | -,3147                     | 1,3206          |

Basadas en las medias observadas.

El término de error es la media cuadrática(Error) = 1,916.

\*. La diferencia de medias es significativa al nivel ,05.
