# Supplementary material for: Muscular fatigue in response to different modalities of CrossFit sessions
Source: PubMed Central journal article supplement (PMC5533437; doi:10.1371/journal.pone.0181855), 2017-07-28
Supplement: pone.0181855.s008.pdf [file pone.0181855.s008.pdf]

# TOTAL DURATION JUMP

## Factores intra-sujetos

Medida:MEASURE\_1

| Tiempo | Variable dependiente         |
|--------|------------------------------|
| 1      | W_CMJ_Med_Pre__Tiempo_TOTAL  |
| 2      | W_CMJ_2y5__Tiempo_TOTAL      |
| 3      | W_CMJ_Med_Post__Tiempo_TOTAL |

## Estadísticos descriptivos

|                              | Media | Desviación típica | N  |
|------------------------------|-------|-------------------|----|
| W_CMJ_Med_Pre__Tiempo_TOTAL  | ,7203 | ,09083            | 34 |
| W_CMJ_2y5__Tiempo_TOTAL      | ,7465 | ,09556            | 34 |
| W_CMJ_Med_Post__Tiempo_TOTAL | ,7431 | ,09666            | 34 |

**Contrastes multivariados<sup>c</sup>**

| Efecto |                    | Valor | F                  | Gl de la hipótesis | Gl del error | Sig. | Eta al cuadrado parcial | Parámetro de no centralidad Parámetro | Potencia observada <sup>b</sup> |
|--------|--------------------|-------|--------------------|--------------------|--------------|------|-------------------------|---------------------------------------|---------------------------------|
| Tiempo | Traza de Pillai    | ,243  | 5,139 <sup>a</sup> | 2,000              | 32,000       | ,012 | ,243                    | 10,278                                | ,787                            |
|        | Lambda de Wilks    | ,757  | 5,139 <sup>a</sup> | 2,000              | 32,000       | ,012 | ,243                    | 10,278                                | ,787                            |
|        | Traza de Hotelling | ,321  | 5,139 <sup>a</sup> | 2,000              | 32,000       | ,012 | ,243                    | 10,278                                | ,787                            |
|        | Raíz mayor de Roy  | ,321  | 5,139 <sup>a</sup> | 2,000              | 32,000       | ,012 | ,243                    | 10,278                                | ,787                            |

a. Estadístico exacto

b. Calculado con alfa = ,05

c. Diseño: Intersección

Diseño intra-sujetos: Tiempo

**Prueba de esfericidad de Mauchly<sup>b</sup>**

Medida: MEASURE\_1

| Efecto intra-sujetos | W de Mauchly | Chi-cuadrado aprox. | gl | Sig. | Epsilon <sup>a</sup> |             |                 |
|----------------------|--------------|---------------------|----|------|----------------------|-------------|-----------------|
|                      |              |                     |    |      | Greenhouse-Geisser   | Huynh-Feldt | Límite-inferior |
| Tiempo               | ,820         | 6,344               | 2  | ,042 | ,848                 | ,889        | ,500            |

Contrasta la hipótesis nula de que la matriz de covarianza error de las variables dependientes transformadas es proporcional a una matriz identidad.

a. Puede usarse para corregir los grados de libertad en las pruebas de significación promediadas. Las pruebas corregidas se muestran en la tabla Pruebas de los efectos inter-sujetos.

b. Diseño: Intersección

Diseño intra-sujetos: Tiempo

**Pruebas de efectos intra-sujetos.**

Medida:MEASURE\_1

| Origen        |                     | Suma de<br>cuadrados tipo<br>III | gl     | Media<br>cuadrática | F     | Sig. | Eta al cuadrado<br>parcial | Parámetro de<br>no centralidad<br>Parámetro | Potencia<br>observada <sup>a</sup> |
|---------------|---------------------|----------------------------------|--------|---------------------|-------|------|----------------------------|---------------------------------------------|------------------------------------|
| Tiempo        | Esfericidad asumida | ,014                             | 2      | ,007                | 3,188 | ,048 | ,088                       | 6,377                                       | ,591                               |
|               | Greenhouse-Geisser  | ,014                             | 1,695  | ,008                | 3,188 | ,057 | ,088                       | 5,405                                       | ,542                               |
|               | Huynh-Feldt         | ,014                             | 1,777  | ,008                | 3,188 | ,054 | ,088                       | 5,666                                       | ,556                               |
|               | Límite-inferior     | ,014                             | 1,000  | ,014                | 3,188 | ,083 | ,088                       | 3,188                                       | ,411                               |
| Error(Tiempo) | Esfericidad asumida | ,143                             | 66     | ,002                |       |      |                            |                                             |                                    |
|               | Greenhouse-Geisser  | ,143                             | 55,940 | ,003                |       |      |                            |                                             |                                    |
|               | Huynh-Feldt         | ,143                             | 58,647 | ,002                |       |      |                            |                                             |                                    |
|               | Límite-inferior     | ,143                             | 33,000 | ,004                |       |      |                            |                                             |                                    |

a. Calculado con alfa = ,05

**Comparaciones por pares**

Medida:MEASURE\_1

| (I)Tiempo | (J)Tiempo | Diferencia de<br>medias (I-J) | Error t <sub>p</sub> . | Sig. <sup>a</sup> | Intervalo de confianza al 95 %<br>para la diferencia <sup>a</sup> |                 |
|-----------|-----------|-------------------------------|------------------------|-------------------|-------------------------------------------------------------------|-----------------|
|           |           |                               |                        |                   | Límite inferior                                                   | Límite superior |
| 1         | 2         | -,026*                        | ,009                   | ,014              | -,048                                                             | -,004           |
|           | 3         | -,023                         | ,012                   | ,191              | -,053                                                             | ,007            |
| 2         | 1         | ,026*                         | ,009                   | ,014              | ,004                                                              | ,048            |
|           | 3         | ,003                          | ,013                   | 1,000             | -,029                                                             | ,036            |
| 3         | 1         | ,023                          | ,012                   | ,191              | -,007                                                             | ,053            |
|           | 2         | -,003                         | ,013                   | 1,000             | -,036                                                             | ,029            |

Basadas en las medias marginales estimadas.

\*. La diferencia de medias es significativa al nivel ,05.

a. Ajuste para comparaciones múltiples: Bonferroni.

# ECCENTRIC PHASE

## Factores intra-sujetos

Medida:MEASURE\_1

| Tiempo | Variable dependiente              |
|--------|-----------------------------------|
| 1      | Weight_Pre_Tiempo_Excentrico_Med  |
| 2      | Weight_2y5_Tiempo_Excentrico      |
| 3      | Weight_Post_Tiempo_Excentrico_Med |

## Estadísticos descriptivos

|                                   | Media | Desviación<br>típica | N  |
|-----------------------------------|-------|----------------------|----|
| Weight_Pre_Tiempo_Excentrico_Med  | ,4892 | ,07996               | 34 |
| Weight_2y5_Tiempo_Excentrico      | ,4790 | ,07925               | 34 |
| Weight_Post_Tiempo_Excentrico_Med | ,5076 | ,08927               | 34 |

**Contrastes multivariados<sup>c</sup>**

| Efecto                 | Valor | F                  | Gl de la hipótesis | Gl del error | Sig. | Eta al cuadrado parcial | Parámetro de no centralidad Parámetro | Potencia observada <sup>b</sup> |
|------------------------|-------|--------------------|--------------------|--------------|------|-------------------------|---------------------------------------|---------------------------------|
| Tiempo Traza de Pillai | ,111  | 2,007 <sup>a</sup> | 2,000              | 32,000       | ,151 | ,111                    | 4,014                                 | ,384                            |
| Lambda de Wilks        | ,889  | 2,007 <sup>a</sup> | 2,000              | 32,000       | ,151 | ,111                    | 4,014                                 | ,384                            |
| Traza de Hotelling     | ,125  | 2,007 <sup>a</sup> | 2,000              | 32,000       | ,151 | ,111                    | 4,014                                 | ,384                            |
| Raíz mayor de Roy      | ,125  | 2,007 <sup>a</sup> | 2,000              | 32,000       | ,151 | ,111                    | 4,014                                 | ,384                            |

a. Estadístico exacto

b. Calculado con alfa = ,05

c. Diseño: Intersección

Diseño intra-sujetos: Tiempo

**Prueba de esfericidad de Mauchly<sup>b</sup>**

Medida: MEASURE\_1

| Efecto intra-sujetos | W de Mauchly | Chi-cuadrado aprox. | gl | Sig. | Epsilon <sup>a</sup> |             |                 |
|----------------------|--------------|---------------------|----|------|----------------------|-------------|-----------------|
|                      |              |                     |    |      | Greenhouse-Geisser   | Huynh-Feldt | Límite-inferior |
| Tiempo               | ,990         | ,316                | 2  | ,854 | ,990                 | 1,000       | ,500            |

Contrasta la hipótesis nula de que la matriz de covarianza error de las variables dependientes transformadas es proporcional a una matriz identidad.

a. Puede usarse para corregir los grados de libertad en las pruebas de significación promediadas. Las pruebas corregidas se muestran en la tabla Pruebas de los efectos inter-sujetos.

b. Diseño: Intersección

Diseño intra-sujetos: Tiempo

**Pruebas de efectos intra-sujetos.**

Medida:MEASURE\_1

| Origen        |                     | Suma de cuadrados tipo III | gl     | Media cuadrática | F     | Sig. | Eta al cuadrado parcial | Parámetro de no centralidad Parámetro | Potencia observada <sup>a</sup> |
|---------------|---------------------|----------------------------|--------|------------------|-------|------|-------------------------|---------------------------------------|---------------------------------|
| Tiempo        | Esfericidad asumida | ,014                       | 2      | ,007             | 2,020 | ,141 | ,058                    | 4,040                                 | ,403                            |
|               | Greenhouse-Geisser  | ,014                       | 1,981  | ,007             | 2,020 | ,141 | ,058                    | 4,001                                 | ,400                            |
|               | Huynh-Feldt         | ,014                       | 2,000  | ,007             | 2,020 | ,141 | ,058                    | 4,040                                 | ,403                            |
|               | Límite-inferior     | ,014                       | 1,000  | ,014             | 2,020 | ,165 | ,058                    | 2,020                                 | ,281                            |
| Error(Tiempo) | Esfericidad asumida | ,234                       | 66     | ,004             |       |      |                         |                                       |                                 |
|               | Greenhouse-Geisser  | ,234                       | 65,358 | ,004             |       |      |                         |                                       |                                 |
|               | Huynh-Feldt         | ,234                       | 66,000 | ,004             |       |      |                         |                                       |                                 |
|               | Límite-inferior     | ,234                       | 33,000 | ,007             |       |      |                         |                                       |                                 |

a. Calculado con alfa = ,05

**Comparaciones por pares**

Medida:MEASURE\_1

| (I)Tiempo | (J)Tiempo | Diferencia de medias (I-J) | Error tít. | Sig. <sup>a</sup> | Intervalo de confianza al 95 % para la diferencia <sup>a</sup> |                 |
|-----------|-----------|----------------------------|------------|-------------------|----------------------------------------------------------------|-----------------|
|           |           |                            |            |                   | Límite inferior                                                | Límite superior |
| 1         | 2         | ,010                       | ,014       | 1,000             | -,025                                                          | ,046            |
|           | 3         | -,018                      | ,015       | ,695              | -,057                                                          | ,020            |
| 2         | 1         | -,010                      | ,014       | 1,000             | -,046                                                          | ,025            |
|           | 3         | -,029                      | ,014       | ,152              | -,064                                                          | ,007            |
| 3         | 1         | ,018                       | ,015       | ,695              | -,020                                                          | ,057            |
|           | 2         | ,029                       | ,014       | ,152              | -,007                                                          | ,064            |

Basadas en las medias marginales estimadas.

a. Ajuste para comparaciones múltiples: Bonferroni.

# ISOMETRIC PHASE

## Factores intra-sujetos

Medida:MEASURE\_1

| Tiempo | Variable dependiente              |
|--------|-----------------------------------|
| 1      | Weight_Pre_Tiempo_Isometrico_Med  |
| 2      | Weight_2y5_Tiempo_Isométrico      |
| 3      | Weight_Post_Tiempo_Isometrico_Med |

## Estadísticos descriptivos

|                                   | Media | Desviación típica | N  |
|-----------------------------------|-------|-------------------|----|
| Weight_Pre_Tiempo_Isometrico_Med  | ,0098 | ,00443            | 34 |
| Weight_2y5_Tiempo_Isométrico      | ,0096 | ,00502            | 34 |
| Weight_Post_Tiempo_Isometrico_Med | ,0160 | ,02747            | 34 |

**Contrastes multivariados<sup>c</sup>**

| Efecto |                    | Valor | F                  | Gl de la hipótesis | Gl del error | Sig. | Eta al cuadrado parcial | Parámetro de no centralidad Parámetro | Potencia observada <sup>b</sup> |
|--------|--------------------|-------|--------------------|--------------------|--------------|------|-------------------------|---------------------------------------|---------------------------------|
| Tiempo | Traza de Pillai    | ,065  | 1,109 <sup>a</sup> | 2,000              | 32,000       | ,342 | ,065                    | 2,218                                 | ,228                            |
|        | Lambda de Wilks    | ,935  | 1,109 <sup>a</sup> | 2,000              | 32,000       | ,342 | ,065                    | 2,218                                 | ,228                            |
|        | Traza de Hotelling | ,069  | 1,109 <sup>a</sup> | 2,000              | 32,000       | ,342 | ,065                    | 2,218                                 | ,228                            |
|        | Raíz mayor de Roy  | ,069  | 1,109 <sup>a</sup> | 2,000              | 32,000       | ,342 | ,065                    | 2,218                                 | ,228                            |

a. Estadístico exacto

b. Calculado con alfa = ,05

c. Diseño: Intersección

Diseño intra-sujetos: Tiempo

**Prueba de esfericidad de Mauchly<sup>b</sup>**

Medida: MEASURE\_1

| Efecto intra-sujetos | W de Mauchly | Chi-cuadrado aprox. | gl | Sig. | Epsilon <sup>a</sup> |             |                 |
|----------------------|--------------|---------------------|----|------|----------------------|-------------|-----------------|
|                      |              |                     |    |      | Greenhouse-Geisser   | Huynh-Feldt | Límite-inferior |
| Tiempo               | ,137         | 63,628              | 2  | ,000 | ,537                 | ,540        | ,500            |

Contrasta la hipótesis nula de que la matriz de covarianza error de las variables dependientes transformadas es proporcional a una matriz identidad.

a. Puede usarse para corregir los grados de libertad en las pruebas de significación promediadas. Las pruebas corregidas se muestran en la tabla Pruebas de los efectos inter-sujetos.

b. Diseño: Intersección

Diseño intra-sujetos: Tiempo



**Pruebas de efectos intra-sujetos.**

Medida:MEASURE\_1

| Origen        |                        | Suma de cuadrados<br>tipo III | gl     | Media<br>cuadrática | F     | Sig. | Eta al cuadrado<br>parcial | Parámetro de no<br>centralidad Parámetro | Potencia<br>observada <sup>a</sup> |
|---------------|------------------------|-------------------------------|--------|---------------------|-------|------|----------------------------|------------------------------------------|------------------------------------|
| Tiempo        | Esfericidad<br>asumida | ,001                          | 2      | ,000                | 1,774 | ,178 | ,051                       | 3,547                                    | ,359                               |
|               | Greenhouse-<br>Geisser | ,001                          | 1,073  | ,001                | 1,774 | ,192 | ,051                       | 1,904                                    | ,261                               |
|               | Huynh-Feldt            | ,001                          | 1,081  | ,001                | 1,774 | ,192 | ,051                       | 1,916                                    | ,262                               |
|               | Límite-inferior        | ,001                          | 1,000  | ,001                | 1,774 | ,192 | ,051                       | 1,774                                    | ,253                               |
| Error(Tiempo) | Esfericidad<br>asumida | ,017                          | 66     | ,000                |       |      |                            |                                          |                                    |
|               | Greenhouse-<br>Geisser | ,017                          | 35,425 | ,000                |       |      |                            |                                          |                                    |
|               | Huynh-Feldt            | ,017                          | 35,659 | ,000                |       |      |                            |                                          |                                    |
|               | Límite-inferior        | ,017                          | 33,000 | ,001                |       |      |                            |                                          |                                    |

a. Calculado con alfa = ,05

**Comparaciones por pares**

Medida:MEASURE\_1

| (I)Tiempo | (J)Tiempo | Diferencia de<br>medias (I-J) | Error t <sub>íp.</sub> | Sig. <sup>a</sup> | Intervalo de confianza al 95 %<br>para la diferencia <sup>a</sup> |                 |
|-----------|-----------|-------------------------------|------------------------|-------------------|-------------------------------------------------------------------|-----------------|
|           |           |                               |                        |                   | Límite inferior                                                   | Límite superior |
| 1         | 2         | ,000                          | ,001                   | 1,000             | -,003                                                             | ,003            |
|           | 3         | -,006                         | ,005                   | ,629              | -,018                                                             | ,006            |
| 2         | 1         | ,000                          | ,001                   | 1,000             | -,003                                                             | ,003            |
|           | 3         | -,006                         | ,004                   | ,490              | -,018                                                             | ,005            |
| 3         | 1         | ,006                          | ,005                   | ,629              | -,006                                                             | ,018            |
|           | 2         | ,006                          | ,004                   | ,490              | -,005                                                             | ,018            |

Basadas en las medias marginales estimadas.

a. Ajuste para comparaciones múltiples: Bonferroni.

# CONCENTRIC PHASE

## Factores intra-sujetos

Medida:MEASURE\_1

| Tiempo | Variable dependiente               |
|--------|------------------------------------|
| 1      | Weight_Pre_Tiempo_Concentrico_Med  |
| 2      | Weight_2y5_Tiempo_Concéntrico      |
| 3      | Weight_Post_Tiempo_Concentrico_Med |

## Estadísticos descriptivos

|                                    | Media | Desviación típica | N  |
|------------------------------------|-------|-------------------|----|
| Weight_Pre_Tiempo_Concentrico_Med  | ,2229 | ,04254            | 34 |
| Weight_2y5_Tiempo_Concéntrico      | ,2579 | ,06236            | 34 |
| Weight_Post_Tiempo_Concentrico_Med | ,2195 | ,07060            | 34 |

**Contrastes multivariados<sup>c</sup>**

| Efecto |                    | Valor | F                  | Gl de la hipótesis | Gl del error | Sig. | Eta al cuadrado parcial | Parámetro de no centralidad Parámetro | Potencia observada <sup>b</sup> |
|--------|--------------------|-------|--------------------|--------------------|--------------|------|-------------------------|---------------------------------------|---------------------------------|
| Tiempo | Traza de Pillai    | ,276  | 6,101 <sup>a</sup> | 2,000              | 32,000       | ,006 | ,276                    | 12,201                                | ,856                            |
|        | Lambda de Wilks    | ,724  | 6,101 <sup>a</sup> | 2,000              | 32,000       | ,006 | ,276                    | 12,201                                | ,856                            |
|        | Traza de Hotelling | ,381  | 6,101 <sup>a</sup> | 2,000              | 32,000       | ,006 | ,276                    | 12,201                                | ,856                            |
|        | Raíz mayor de Roy  | ,381  | 6,101 <sup>a</sup> | 2,000              | 32,000       | ,006 | ,276                    | 12,201                                | ,856                            |

a. Estadístico exacto

b. Calculado con alfa = ,05

c. Diseño: Intersección

Diseño intra-sujetos: Tiempo

**Prueba de esfericidad de Mauchly<sup>b</sup>**

Medida: MEASURE\_1

| Efecto intra-sujetos | W de Mauchly | Chi-cuadrado aprox. | gl | Sig. | Epsilon <sup>a</sup> |             |                 |
|----------------------|--------------|---------------------|----|------|----------------------|-------------|-----------------|
|                      |              |                     |    |      | Greenhouse-Geisser   | Huynh-Feldt | Límite-inferior |
| Tiempo               | ,942         | 1,910               | 2  | ,385 | ,945                 | 1,000       | ,500            |

Contrasta la hipótesis nula de que la matriz de covarianza error de las variables dependientes transformadas es proporcional a una matriz identidad.

a. Puede usarse para corregir los grados de libertad en las pruebas de significación promediadas. Las pruebas corregidas se muestran en la tabla Pruebas de los efectos inter-sujetos.

b. Diseño: Intersección

Diseño intra-sujetos: Tiempo

Pruebas de efectos intra-sujetos.

Medida:MEASURE\_1

| Origen        |                     | Suma de cuadrados tipo III | gl     | Media cuadrática | F     | Sig. | Eta al cuadrado parcial | Parámetro de no centralidad Parámetro | Potencia observada <sup>a</sup> |
|---------------|---------------------|----------------------------|--------|------------------|-------|------|-------------------------|---------------------------------------|---------------------------------|
| Tiempo        | Esfericidad asumida | ,031                       | 2      | ,015             | 7,805 | ,001 | ,191                    | 15,610                                | ,943                            |
|               | Greenhouse-Geisser  | ,031                       | 1,890  | ,016             | 7,805 | ,001 | ,191                    | 14,755                                | ,933                            |
|               | Huynh-Feldt         | ,031                       | 2,000  | ,015             | 7,805 | ,001 | ,191                    | 15,610                                | ,943                            |
|               | Límite-inferior     | ,031                       | 1,000  | ,031             | 7,805 | ,009 | ,191                    | 7,805                                 | ,774                            |
| Error(Tiempo) | Esfericidad asumida | ,130                       | 66     | ,002             |       |      |                         |                                       |                                 |
|               | Greenhouse-Geisser  | ,130                       | 62,386 | ,002             |       |      |                         |                                       |                                 |
|               | Huynh-Feldt         | ,130                       | 66,000 | ,002             |       |      |                         |                                       |                                 |
|               | Límite-inferior     | ,130                       | 33,000 | ,004             |       |      |                         |                                       |                                 |

a. Calculado con alfa = ,05

Comparaciones por pares

Medida:MEASURE\_1

| (I)Tiempo | (J)Tiempo | Diferencia de medias (I-J) | Error tít. | Sig. <sup>a</sup> | Intervalo de confianza al 95 % para la diferencia <sup>a</sup> |                 |
|-----------|-----------|----------------------------|------------|-------------------|----------------------------------------------------------------|-----------------|
|           |           |                            |            |                   | Límite inferior                                                | Límite superior |
| 1         | 2         | -,035*                     | ,011       | ,011              | -,063                                                          | -,007           |
|           | 3         | ,003                       | ,009       | 1,000             | -,020                                                          | ,027            |
| 2         | 1         | ,035*                      | ,011       | ,011              | ,007                                                           | ,063            |
|           | 3         | ,038*                      | ,012       | ,006              | ,009                                                           | ,068            |
| 3         | 1         | -,003                      | ,009       | 1,000             | -,027                                                          | ,020            |
|           | 2         | -,038*                     | ,012       | ,006              | -,068                                                          | -,009           |

Basadas en las medias marginales estimadas.

\*. La diferencia de medias es significativa al nivel ,05.

a. Ajuste para comparaciones múltiples: Bonferroni.
